# Supplementary material for: Bioinspired wood-like coaxial fibers based on MXene@graphene oxide with superior mechanical and electrical properties
Source: Royal Society of Chemistry journal article supplement (doi:10.1039/d0nr04928j), 2020-01-01
Supplement: d0nr04928j1.pdf [file d0nr04928j1.pdf]

## **Supporting information for**

### **Bioinspired wood-like coaxial fibers based on MXene@graphene oxide with superior mechanical and electrical properties**

*Xing Chen,<sup>1,2</sup> Jianjun Jiang,<sup>1\*</sup> Guoyu Yang,<sup>1</sup> Chuanbing Li,<sup>1</sup> Yujun Li<sup>1\*</sup>*

<sup>1</sup>Shaanxi Engineering Research Center for Digital Manufacturing Technology,  
Northwestern Polytechnical University, Xi'an 710072, P. R China

<sup>2</sup>Department of Environmental Engineering, Technical University of Denmark,  
Miljøvej 113, DK-2800 Kongens Lyngby, Denmark

E-mail: jianjun@nwpu.edu.cn(J. Jiang); li.yujun@nwpu.edu.cn(Y. Li)

**The SI file includes 9 Figures.**

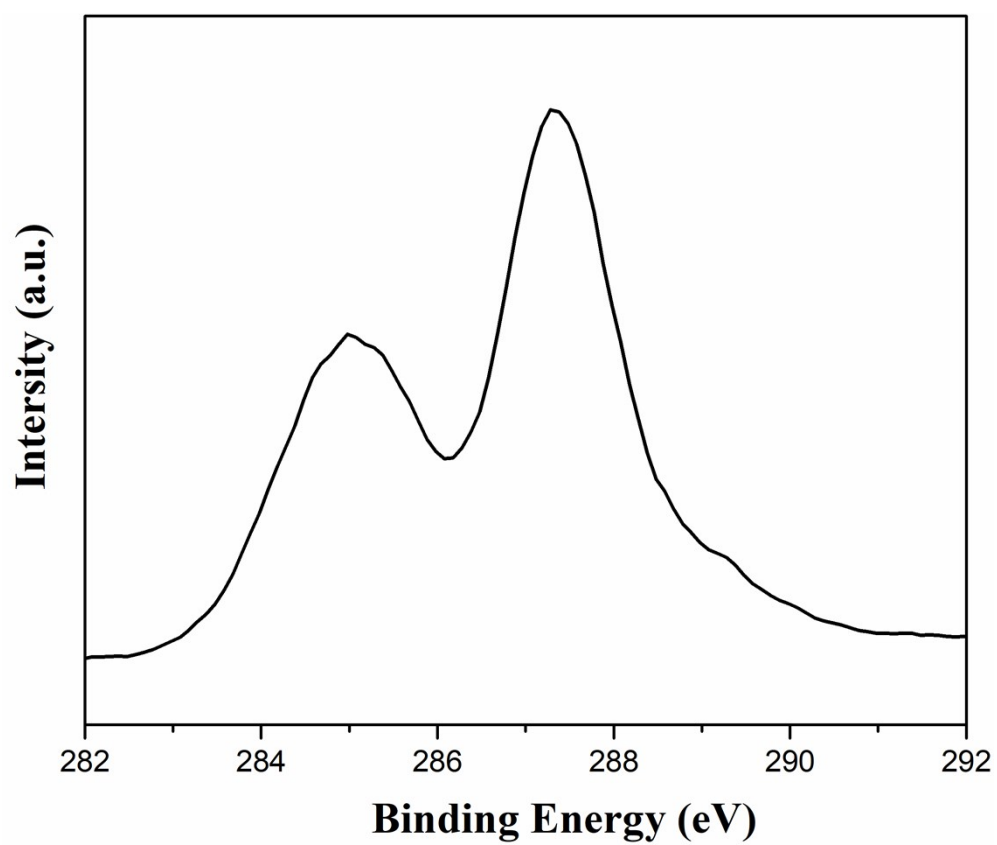

Figure S1. C1s XPS fine spectra of GO.

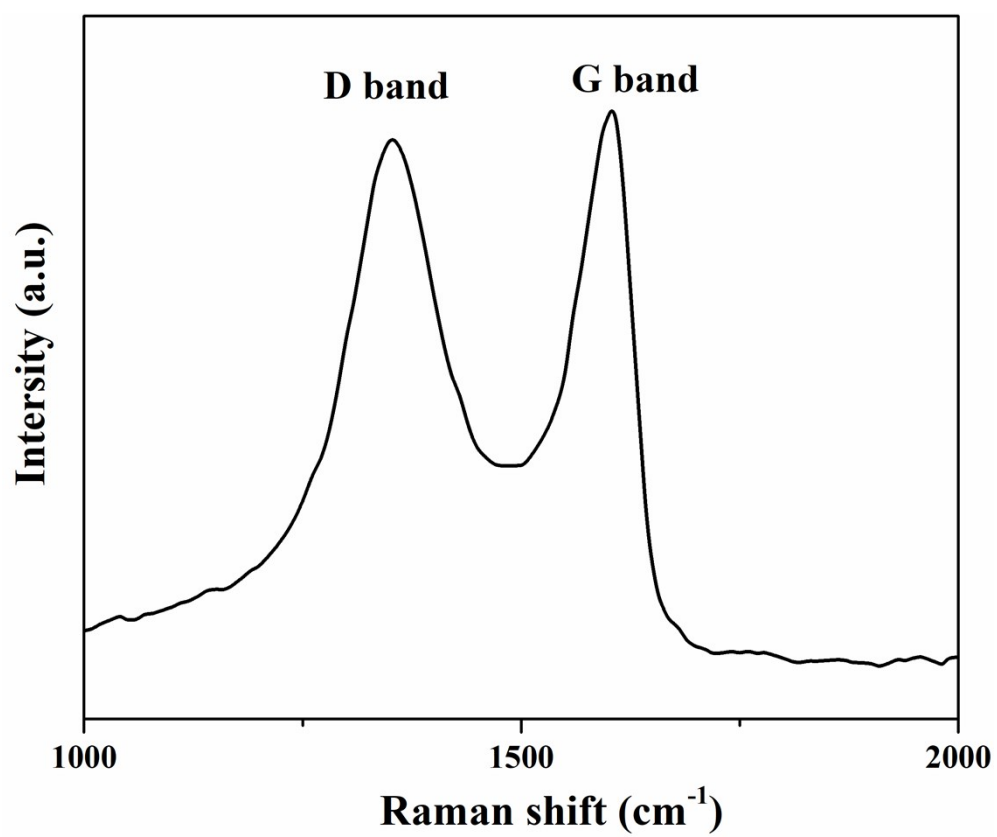

Figure S2. Raman spectra of GO.

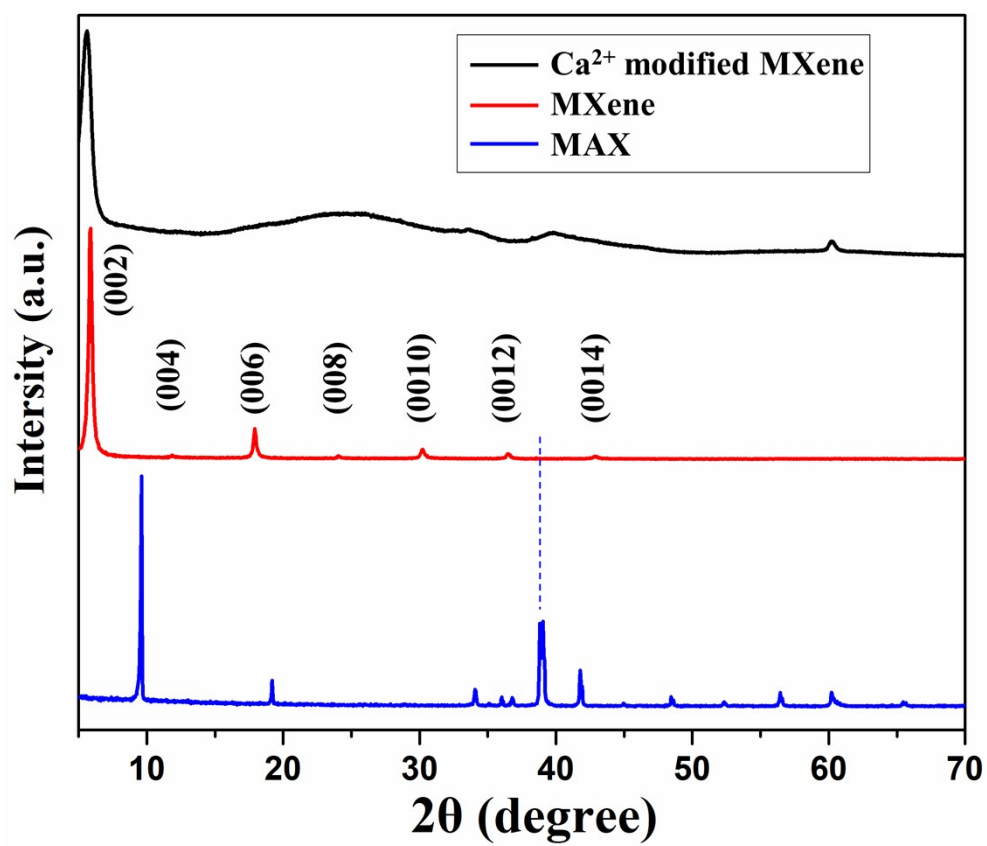

Figure S3. XRD fine spectra of MAX, MXene and  $\text{Ca}^{2+}$  modified MXene.

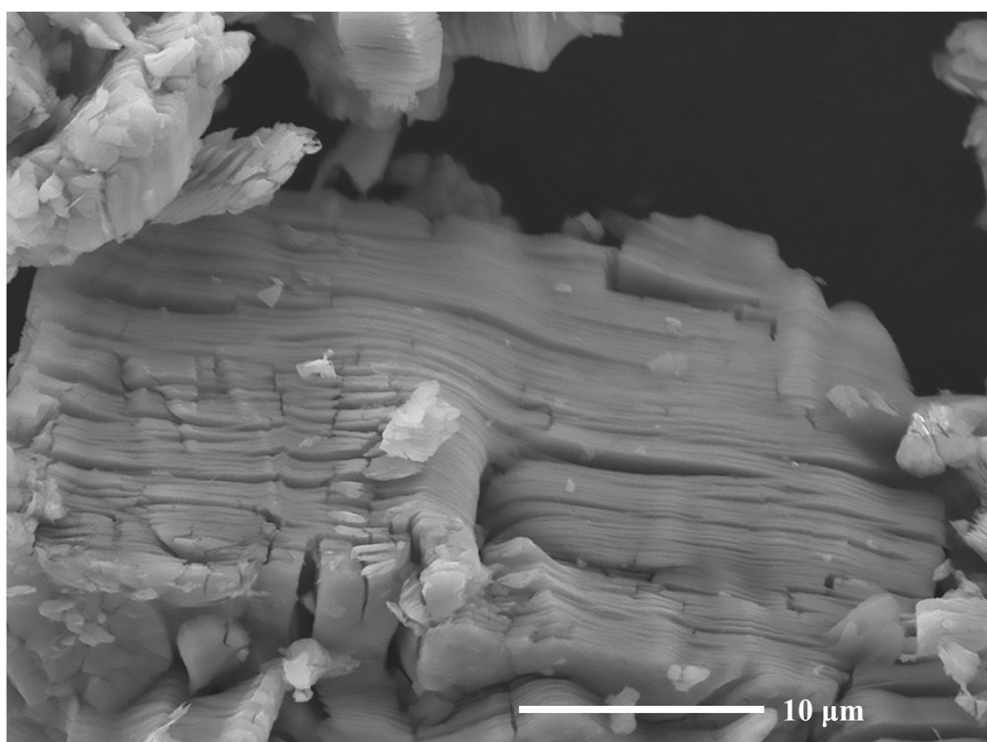

Figure S4. SEM of accordion-like MXene.

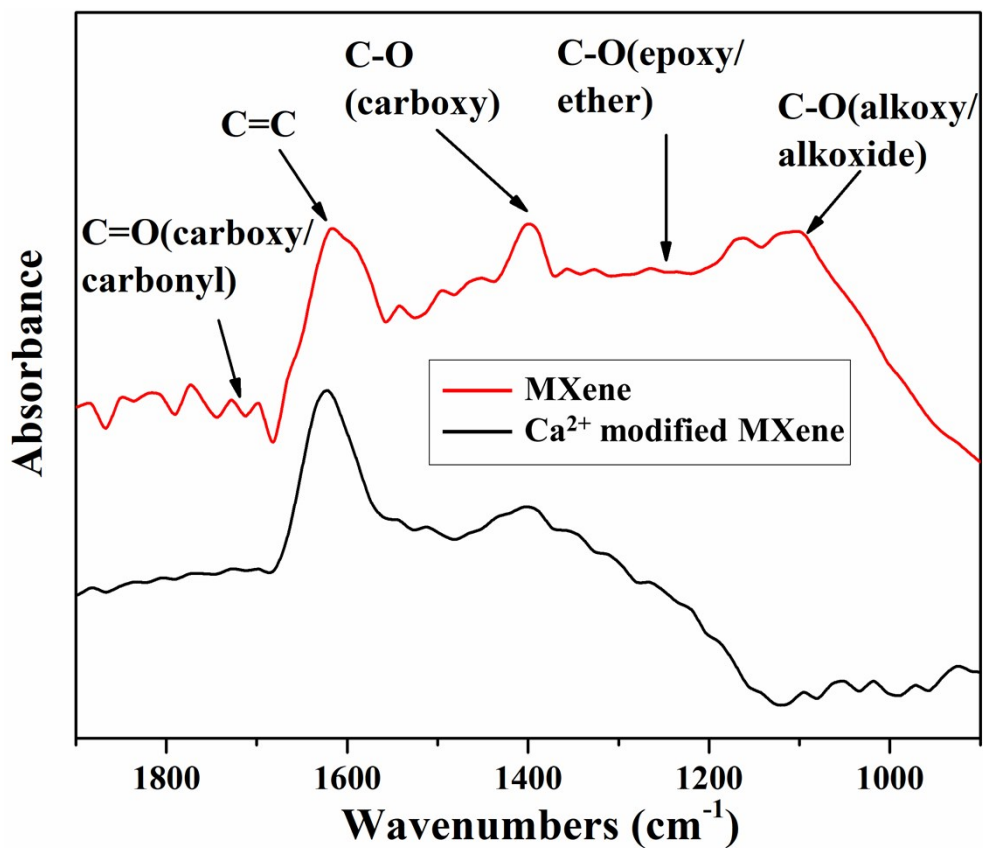

Figure S5. FT-IR spectra of MXene and  $\text{Ca}^{2+}$  modified MXene.

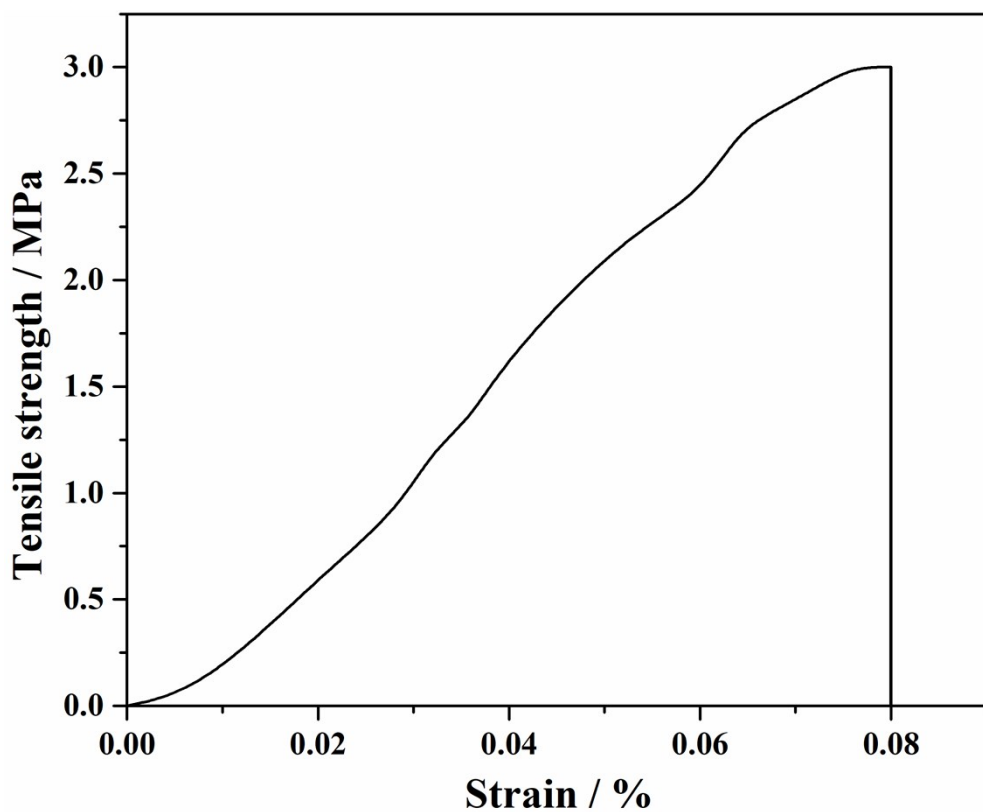

Figure S6. Stress-strain curves of  $\text{Ca}^{2+}$  modified MXene.

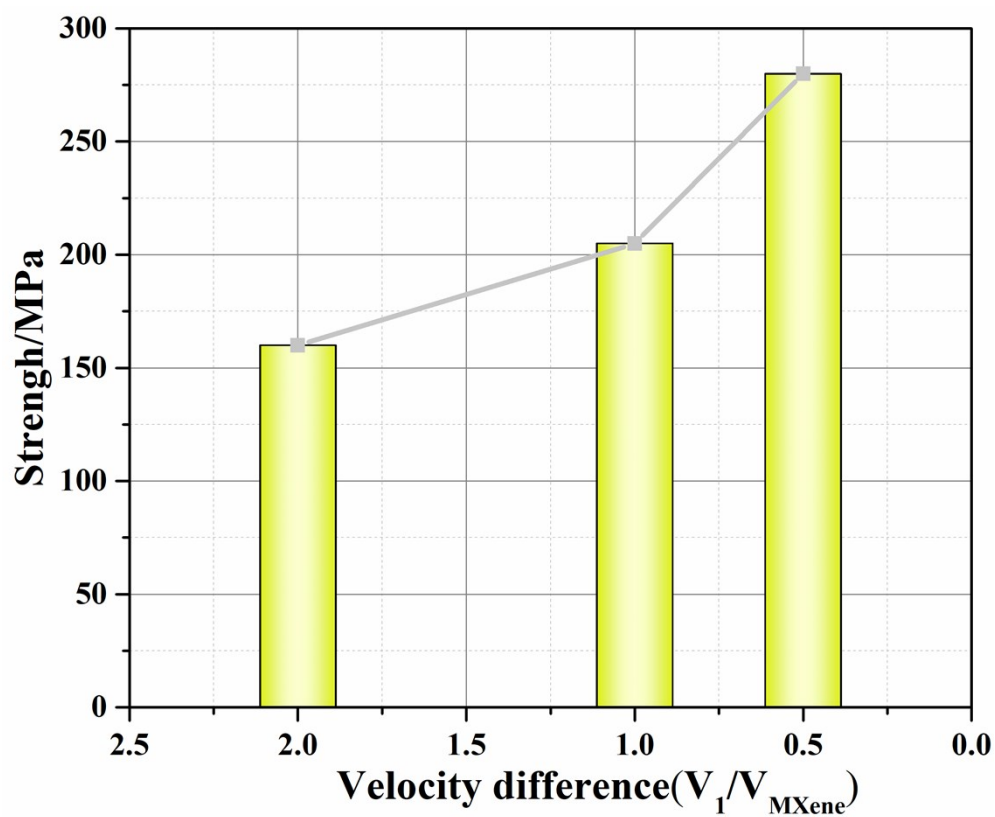

Figure S7. Mechanical properties for MX@GO fiber concerning velocity difference at  $4V_1 = V_2$ .

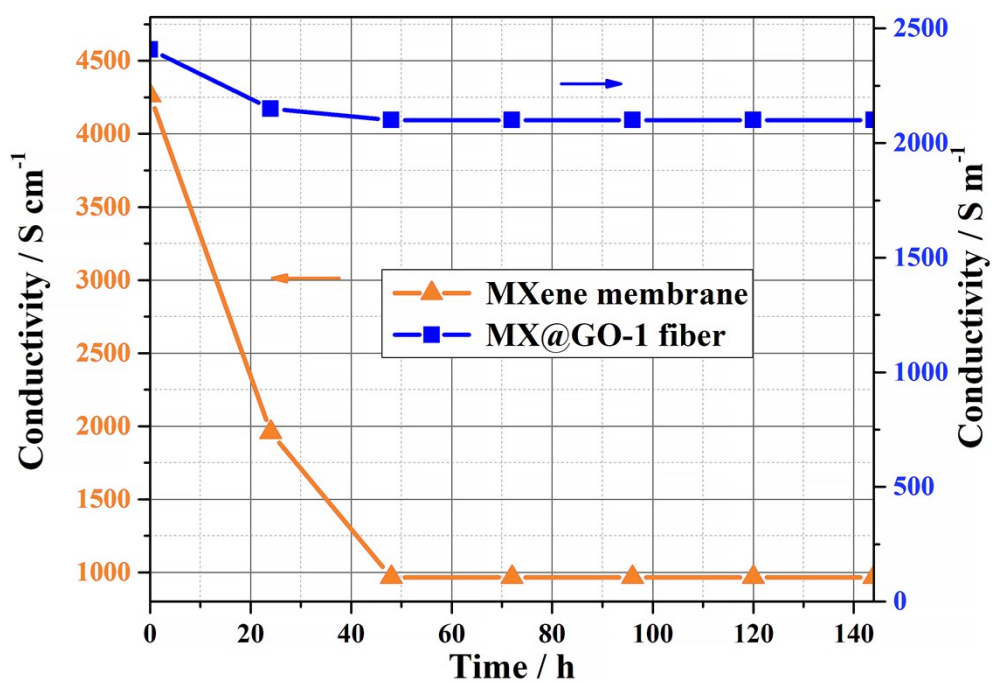

Figure S8. Conductivity of MXene membrane and MX@GO-1 fiber concerning time at  $80^{\circ}C$ .

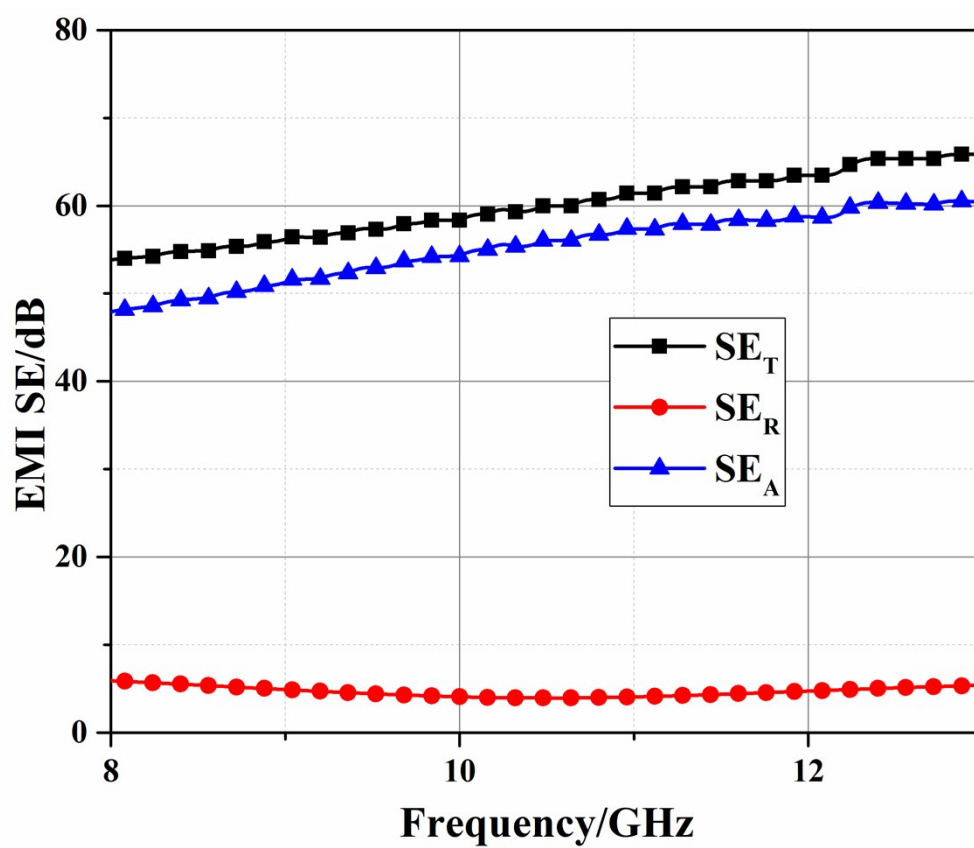

Figure S9. EMI SE of MX/GO-1 in the X-band.
